# Supplementary material for: Enhancing the performance of aqueous zinc ion battery cathodes with a floral spherical V5O12·6H2O/V6O13/CNT nanocomposite
Source: Royal Society of Chemistry journal article supplement (doi:10.1039/d3cp05077g), 2023-01-01
Supplement: d3cp05077g1.pdf [file d3cp05077g1.pdf]

## **Enhancing Aqueous Zinc Ion Battery Cathodes with Floral Arrangement $V_5O_{12}\cdot 6H_2O/V_6O_{13}/CNT$ Composites**

Lingjiang Kou<sup>a, b</sup>, Yong Wang<sup>a</sup>, Jiajia Song<sup>a, b\*</sup>, Taotao Ai<sup>a\*</sup>, Panya  
Wattanapaphawong<sup>b</sup>, Koji Kajiyoshi<sup>b\*</sup>

a: School of Materials Science and Engineering, Shaanxi University of  
Technology, Hanzhong, 723000, China.

b: Research Laboratory of Hydrothermal Chemistry, Faculty of Science  
and Technology, Kochi University, Kochi, 780-8081, Japan.

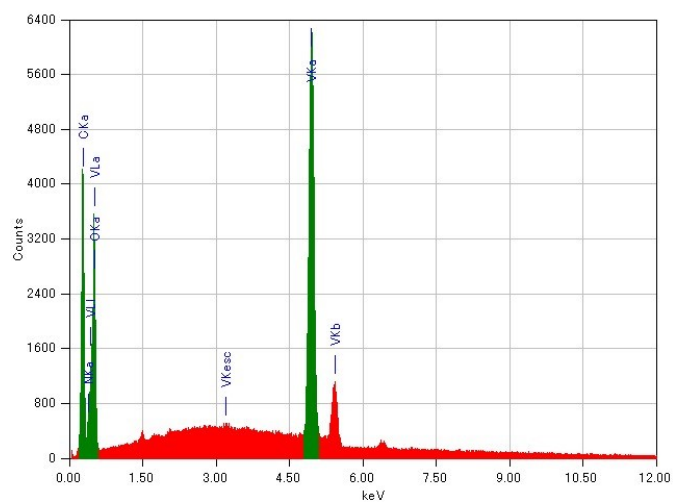

Figure S1. Element spectra of the sample VOH/CNT corresponding to the element mapping.

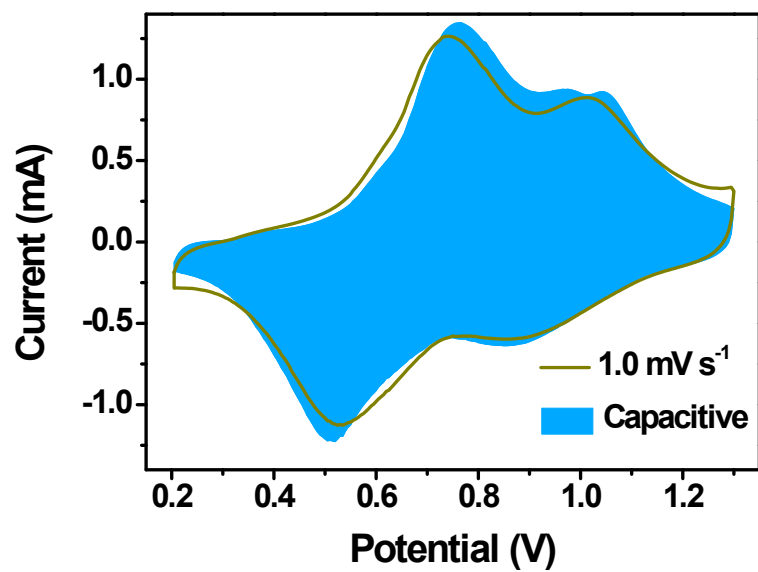

Figure S2. Capacitive contribution to charge storage at 1.0 mV s<sup>-1</sup> For VOH/CNT electrode.
